# Supplementary material for: Identification of Appropriate Reference Genes for Normalization of miRNA Expression in Grafted Watermelon Plants under Different Nutrient Stresses
Source: PubMed Central journal article supplement (PMC5066974; doi:10.1371/journal.pone.0164725), 2016-10-17
Supplement: pone.0164725.s002.pdf [file pone.0164725.s002.pdf]

S1 Table. Formulas of nutrient solution.

| <b>N sufficient</b>                                                                |               | <b>N deficient</b>                                                                 |               |
|------------------------------------------------------------------------------------|---------------|------------------------------------------------------------------------------------|---------------|
| Component                                                                          | Concentration | Component                                                                          | Concentration |
| Ca(NO <sub>3</sub> ) <sub>2</sub> ·4H <sub>2</sub> O                               | 2.5mM         | Ca(NO <sub>3</sub> ) <sub>2</sub> ·4H <sub>2</sub> O                               | 0.25mM        |
| KNO <sub>3</sub>                                                                   | 2.5mM         | KNO <sub>3</sub>                                                                   | 0.25mM        |
| KH <sub>2</sub> PO <sub>4</sub>                                                    | 0.5mM         | CaCl <sub>2</sub>                                                                  | 2.25mM        |
| MgSO <sub>4</sub> ·7 H <sub>2</sub> O                                              | 1.4mM         | KCl                                                                                | 2.25mM        |
| H <sub>3</sub> BO <sub>3</sub>                                                     | 50uM          | KH <sub>2</sub> PO <sub>4</sub>                                                    | 0.5mM         |
| MnSO <sub>4</sub> ·H <sub>2</sub> O                                                | 10μm          | MgSO <sub>4</sub> ·7 H <sub>2</sub> O                                              | 1.4mM         |
| ZnSO <sub>4</sub> ·7H <sub>2</sub> O                                               | 0.76μm        | H <sub>3</sub> BO <sub>3</sub>                                                     | 50uM          |
| CuSO <sub>4</sub> ·5H <sub>2</sub> O                                               | 032μm         | MnSO <sub>4</sub> ·H <sub>2</sub> O                                                | 10μm          |
| (NH <sub>4</sub> ) <sub>6</sub> Mo <sub>7</sub> O <sub>24</sub> ·4H <sub>2</sub> O | 0.016μm       | ZnSO <sub>4</sub> ·7H <sub>2</sub> O                                               | 0.76μm        |
| Na <sub>2</sub> Fe-EDTA                                                            | 0.077μm       | CuSO <sub>4</sub> ·5H <sub>2</sub> O                                               | 032μm         |
|                                                                                    |               | (NH <sub>4</sub> ) <sub>6</sub> Mo <sub>7</sub> O <sub>24</sub> ·4H <sub>2</sub> O | 0.016μm       |
|                                                                                    |               | Na <sub>2</sub> Fe-EDTA                                                            | 0.077μm       |
| <b>P sufficient</b>                                                                |               | <b>P deficient</b>                                                                 |               |
| Component                                                                          | Concentration | Component                                                                          | Concentration |
| Ca(NO <sub>3</sub> ) <sub>2</sub> ·4H <sub>2</sub> O                               | 2mM           | Ca(NO <sub>3</sub> ) <sub>2</sub> ·4H <sub>2</sub> O                               | 2mM           |
| NH <sub>4</sub> NO <sub>3</sub>                                                    | 0.5mM         | NH <sub>4</sub> NO <sub>3</sub>                                                    | 0.5mM         |
| KNO <sub>3</sub>                                                                   | 2.5mM         | KNO <sub>3</sub>                                                                   | 2.5mM         |
| KH <sub>2</sub> PO <sub>4</sub>                                                    | 0.5mM         | KH <sub>2</sub> PO <sub>4</sub>                                                    | 0.01mM        |
| MgSO <sub>4</sub> ·7 H <sub>2</sub> O                                              | 1.4mM         | K <sub>2</sub> SO <sub>4</sub>                                                     | 0.26mM        |
| H <sub>3</sub> BO <sub>3</sub>                                                     | 50uM          | MgSO <sub>4</sub> ·7 H <sub>2</sub> O                                              | 1.4mM         |
| MnSO <sub>4</sub> ·H <sub>2</sub> O                                                | 10μm          | H <sub>3</sub> BO <sub>3</sub>                                                     | 50uM          |
| ZnSO <sub>4</sub> ·7H <sub>2</sub> O                                               | 0.76μm        | MnSO <sub>4</sub> ·H <sub>2</sub> O                                                | 10μm          |
| CuSO <sub>4</sub> ·5H <sub>2</sub> O                                               | 032μm         | ZnSO <sub>4</sub> ·7H <sub>2</sub> O                                               | 0.76μm        |
| (NH <sub>4</sub> ) <sub>6</sub> Mo <sub>7</sub> O <sub>24</sub> ·4H <sub>2</sub> O | 0.016μm       | CuSO <sub>4</sub> ·5H <sub>2</sub> O                                               | 032μm         |
| Na <sub>2</sub> Fe-EDTA                                                            | 0.077μm       | (NH <sub>4</sub> ) <sub>6</sub> Mo <sub>7</sub> O <sub>24</sub> ·4H <sub>2</sub> O | 0.016μm       |
|                                                                                    |               | Na <sub>2</sub> Fe-EDTA                                                            | 0.077μm       |

All of these formulas were modified from Hoagland solution [23].
