# Supplementary material for: Identification of Appropriate Reference Genes for Normalization of miRNA Expression in Grafted Watermelon Plants under Different Nutrient Stresses
Source: PubMed Central journal article supplement (PMC5066974; doi:10.1371/journal.pone.0164725), 2016-10-17
Supplement: pone.0164725.s003.pdf [file pone.0164725.s003.pdf]

**S2 Table. Detailed information about the reference genes from small RNA-seq data in watermelon, squash and bottle gourd.**

| Name <sup>a</sup>  | ID                           | Length (nt) | Sequence                 | Normalized reads |       |       | fold-change(log <sub>2</sub> (Wm/Bg)/(Wm/Wm)) | fold-change(log <sub>2</sub> (Wm/Sq)/(Wm/Wm)) |
|--------------------|------------------------------|-------------|--------------------------|------------------|-------|-------|-----------------------------------------------|-----------------------------------------------|
|                    |                              |             |                          | Wm/Wm            | Wm/Bg | Wm/Sq |                                               |                                               |
| <i>Cla-miR81</i>   | unconservative_Chr1_116693   | 24          | ATGTCTATCTGGGTCTATCGCAGT | 51               | 62    | 58    | 0.281770968                                   | 0.185555653                                   |
| <i>Cla-miR82</i>   | unconservative_Chr10_2427841 | 24          | ATTGTTGTTACATAAAGGACGAGT | 64               | 70    | 77    | 0.129283017                                   | 0.266786541                                   |
| <i>Cla-miR170</i>  | conservative_Chr11_2887302   | 21          | TGATTGAGCCGCGCAATATC     | 53               | 114   | 90    | 1.10496956                                    | 0.763932642                                   |
| <i>Cla-miR166b</i> | conservative_Chr6_1495765    | 21          | TCGGACCAGGCTTCATCCCC     | 20476            | 6228  | 15207 | -1.717093062                                  | -0.429198342                                  |

  

| Name <sup>b</sup>     | ID                        | Length (nt) | Sequence               | Normalized reads |       | fold-change(log <sub>2</sub> (Wm/Sq)/Sq) |
|-----------------------|---------------------------|-------------|------------------------|------------------|-------|------------------------------------------|
|                       |                           |             |                        | Sq               | Wm/Sq |                                          |
| <i>Cmo-miR3511-3p</i> | conservative_Chr5_1210843 | 22          | AGTTACTAATTAATGATCTGGC | 87               | 80    | -0.121015401                             |
| <i>Cmo-miR166b</i>    | conservative_Chr6_1495765 | 21          | TCGGACCAGGCTTCATCCCC   | 11956            | 13158 | 0.138205416                              |
| <i>Cmo-miR319b</i>    | conservative_Chr5_1343674 | 20          | TTGGACTGAAGGAGCTCCC    | 13277            | 17025 | 0.358725598                              |

  

| Name <sup>c</sup>  | ID                        | Length (nt) | Sequence              | Normalized reads |       | fold change(log <sub>2</sub> (Wm/Bg)/Bg) |
|--------------------|---------------------------|-------------|-----------------------|------------------|-------|------------------------------------------|
|                    |                           |             |                       | Bg               | Wm/Bg |                                          |
| <i>Lsi-miR398b</i> | conservative_Chr3_823696  | 21          | TGTGTTCTCAGGTCGCCCTA  | 800              | 476   | -0.749038426                             |
| <i>Lsi-miR166u</i> | conservative_Chr6_1516438 | 21          | TCTCGGACCAGGCTTCATTCT | 5123             | 2651  | -0.950452222                             |

a, *Citrullus lanatus* miRNA; b, *Cucurbita moschata* miRNA; c, *Lagenaria siceraria* miRNA
