# Supplementary material for: Identification of Appropriate Reference Genes for Normalization of miRNA Expression in Grafted Watermelon Plants under Different Nutrient Stresses
Source: PubMed Central journal article supplement (PMC5066974; doi:10.1371/journal.pone.0164725), 2016-10-17
Supplement: pone.0164725.s004.pdf [file pone.0164725.s004.pdf]

**S3 Table. RQ values for stability (M) and variation values (V) calculation.**

| Reference gene      |                  |                  |                    |               |                    |                       |                    |                       |                    |                    |                    |
|---------------------|------------------|------------------|--------------------|---------------|--------------------|-----------------------|--------------------|-----------------------|--------------------|--------------------|--------------------|
| Sample              | <i>Cla-miR81</i> | <i>Cla-miR82</i> | <i>Cla-miR167f</i> | <i>Cla-U6</i> | <i>CLYLS8</i>      | <i>Cla-18S</i>        | <i>Cla-miR166b</i> | <i>Cla-miR169n-5p</i> | <i>Cla-miR170</i>  | <i>Cla-miR167c</i> |                    |
| <b>N sufficient</b> |                  |                  |                    |               |                    |                       |                    |                       |                    |                    |                    |
| (Wm/Wm)L            | 1.00             | 0.62             | 0.40               | 0.49          | 0.86               | 0.74                  | 0.49               | 0.50                  | 0.79               | 0.62               |                    |
| (Wm/Sq)L            | 0.17             | 0.30             | 0.36               | 0.87          | 0.53               | 0.87                  | 0.31               | 0.60                  | 0.14               | 0.47               |                    |
| (Wm/Bg)L            | 0.38             | 0.35             | 0.44               | 1.00          | 0.56               | 0.59                  | 0.29               | 0.49                  | 0.22               | 0.35               |                    |
| <b>N deficient</b>  |                  |                  |                    |               |                    |                       |                    |                       |                    |                    |                    |
| (Wm/Wm)L            | 0.81             | 0.84             | 0.23               | 0.53          | 1.00               | 0.80                  | 0.41               | 0.56                  | 1.00               | 0.35               |                    |
| (Wm/Sq)L            | 0.33             | 0.80             | 0.40               | 0.22          | 0.57               | 0.90                  | 0.11               | 0.92                  | 0.25               | 0.53               |                    |
| (Wm/Bg)L            | 0.13             | 0.33             | 0.22               | 0.23          | 0.57               | 0.14                  | 0.28               | 0.06                  | 0.07               | 0.15               |                    |
| <b>P sufficient</b> |                  |                  |                    |               |                    |                       |                    |                       |                    |                    |                    |
| (Wm/Wm)L            | 0.45             | 1.00             | 0.29               | 0.23          | 0.62               | 1.00                  | 0.18               | 1.00                  | 0.23               | 0.34               |                    |
| (Wm/Sq)L            | 0.31             | 0.46             | 0.73               | 0.86          | 0.66               | 0.87                  | 0.59               | 0.60                  | 0.30               | 1.00               |                    |
| (Wm/Bg)L            | 0.53             | 0.37             | 0.48               | 0.35          | 0.56               | 0.74                  | 0.52               | 0.42                  | 0.46               | 0.62               |                    |
| <b>P deficient</b>  |                  |                  |                    |               |                    |                       |                    |                       |                    |                    |                    |
| (Wm/Wm)L            | 0.26             | 0.76             | 0.48               | 0.19          | 0.52               | 0.71                  | 0.22               | 0.76                  | 0.16               | 0.61               |                    |
| (Wm/Sq)L            | 0.77             | 0.38             | 1.00               | 0.37          | 0.33               | 0.68                  | 0.18               | 0.25                  | 0.40               | 0.94               |                    |
| (Wm/Bg)L            | 0.13             | 0.42             | 0.19               | 0.25          | 0.41               | 0.28                  | 1.00               | 0.06                  | 0.05               | 0.17               |                    |
| Reference gene      |                  |                  |                    |               |                    |                       |                    |                       |                    |                    |                    |
| Sample              | <i>Cmo-U6</i>    | <i>CmYLS8</i>    | <i>Cmo-18S</i>     | <i>CmPP2A</i> | <i>Cmo-miR167f</i> | <i>Cmo-miR3511-3p</i> | <i>Cmo-miR167b</i> | <i>Cmo-miR166b</i>    | <i>Cmo-miR160a</i> | <i>Cmo-miR167c</i> | <i>Cmo-miR319b</i> |
| <b>N sufficient</b> |                  |                  |                    |               |                    |                       |                    |                       |                    |                    |                    |
| (Sq)R               | 0.23             | 0.51             | 0.44               | 0.43          | 0.49               | 0.28                  | 0.37               | 0.53                  | 0.41               | 0.56               | 0.35               |
| (Wm/Sq)R            | 1.00             | 1.00             | 0.65               | 0.72          | 1.00               | 0.43                  | 0.56               | 1.00                  | 1.00               | 1.00               | 1.00               |
| <b>N deficient</b>  |                  |                  |                    |               |                    |                       |                    |                       |                    |                    |                    |
| (Sq)R               | 0.34             | 0.77             | 1.00               | 0.74          | 0.68               | 1.00                  | 1.00               | 0.46                  | 0.34               | 0.72               | 0.65               |
| (Wm/Sq)R            | 0.37             | 0.87             | 0.61               | 0.78          | 0.45               | 0.54                  | 0.38               | 0.42                  | 0.36               | 0.54               | 0.62               |
| <b>P sufficient</b> |                  |                  |                    |               |                    |                       |                    |                       |                    |                    |                    |
| (Sq)R               | 0.44             | 0.88             | 0.65               | 0.90          | 0.34               | 0.58                  | 0.31               | 0.38                  | 0.33               | 0.37               | 0.43               |
| (Wm/Sq)R            | 0.40             | 0.44             | 0.21               | 0.69          | 0.11               | 0.62                  | 0.13               | 0.15                  | 0.08               | 0.14               | 0.31               |
| <b>P deficient</b>  |                  |                  |                    |               |                    |                       |                    |                       |                    |                    |                    |
| (Sq)R               | 0.56             | 0.96             | 0.71               | 1.00          | 0.79               | 0.44                  | 0.61               | 0.57                  | 0.39               | 1.00               | 0.39               |
| (Wm/Sq)R            | 0.25             | 0.53             | 0.27               | 0.26          | 0.51               | 0.13                  | 0.39               | 0.49                  | 0.90               | 0.57               | 0.49               |

| Reference gene      |                    |                    |                    |                    |               |                    |               |                |
|---------------------|--------------------|--------------------|--------------------|--------------------|---------------|--------------------|---------------|----------------|
| Sample              | <i>Lsi-miR167c</i> | <i>Lsi-miR398b</i> | <i>Lsi-miR166u</i> | <i>Lsi-miR166b</i> | <i>Lsi-U6</i> | <i>Lsi-miR167f</i> | <i>LsPP2A</i> | <i>Lsi-18S</i> |
| <b>N sufficient</b> |                    |                    |                    |                    |               |                    |               |                |
| (Bg)R               | 1.00               | 1.00               | 0.32               | 0.56               | 0.59          | 0.56               | 0.52          | 0.56           |
| (Wm/Bg)R            | 0.75               | 0.50               | 0.76               | 0.93               | 0.60          | 0.82               | 0.57          | 0.79           |
| <b>N deficient</b>  |                    |                    |                    |                    |               |                    |               |                |
| (Bg)R               | 0.54               | 0.37               | 0.25               | 0.69               | 0.77          | 0.35               | 0.54          | 0.33           |
| (Wm/Bg)R            | 0.52               | 0.47               | 0.61               | 0.77               | 0.87          | 0.78               | 0.68          | 1.00           |
| <b>P sufficient</b> |                    |                    |                    |                    |               |                    |               |                |
| (Bg)R               | 0.55               | 0.46               | 0.87               | 1.00               | 0.83          | 0.74               | 1.00          | 0.81           |
| (Wm/Bg)R            | 0.49               | 0.74               | 1.00               | 0.80               | 0.64          | 1.00               | 0.61          | 0.52           |
| <b>P deficient</b>  |                    |                    |                    |                    |               |                    |               |                |
| (Bg)R               | 0.54               | 0.68               | 0.60               | 0.93               | 1.00          | 0.54               | 0.44          | 0.33           |
| (Wm/Bg)R            | 0.26               | 0.18               | 0.33               | 0.47               | 0.45          | 0.31               | 0.56          | 0.35           |

| Reference gene |                |                |                |            |           |
|----------------|----------------|----------------|----------------|------------|-----------|
| Sample         | <i>miR167c</i> | <i>miR166b</i> | <i>miR167f</i> | <i>18S</i> | <i>U6</i> |
| (Wm/Wm)L       | 0.48           | 0.25           | 0.51           | 0.84       | 0.20      |
| (Wm/Sq)L       | 0.79           | 1.00           | 0.94           | 0.87       | 1.00      |
| (Wm/Bg)L       | 1.00           | 0.50           | 1.00           | 0.47       | 0.67      |
| (Sq)R          | 0.05           | 0.05           | 0.01           | 0.93       | 0.15      |
| (Wm/Sq)R       | 0.04           | 0.07           | 0.01           | 0.78       | 0.07      |
| (Bg)R          | 0.02           | 0.03           | 0.01           | 0.59       | 0.23      |
| (Wm/Bg)R       | 0.05           | 0.06           | 0.02           | 1.00       | 0.28      |

Wm/Wm: self-grafted watermelon; Wm/Sq: squash-grafted watermelon; Wm/Bg: bottle gourd-grafted watermelon, Sq: non-grafted squash; Bg: non-grafted bottle gourd. "L" represents leaf, "R" represents root.

$RQ = 2^{-(Ct \text{ Sample} - Ct \text{ Calibrator})}$ .
