# Supplementary material for: Identification of Appropriate Reference Genes for Normalization of miRNA Expression in Grafted Watermelon Plants under Different Nutrient Stresses
Source: PubMed Central journal article supplement (PMC5066974; doi:10.1371/journal.pone.0164725), 2016-10-17
Supplement: pone.0164725.s005.pdf [file pone.0164725.s005.pdf]

**S4 Table. Grafted watermelon reference genes ranked according to their expression stability as determined by geNorm in different sample sets.**

| Scion samples under N, P starvation | Stability value (M) | Squash rootstock samples under N, P starvation | Stability value (M) | Bottle gourd rootstocks samples under N, P starvation | Stability value (M) | All scion and rootstocks under normal growth conditions | Stability value (M) |
|-------------------------------------|---------------------|------------------------------------------------|---------------------|-------------------------------------------------------|---------------------|---------------------------------------------------------|---------------------|
| <i>Cl</i> -miR167c*                 | 0.371               | <i>Cmo</i> -miR167c*                           | 0.118               | <i>Lsi</i> -miR166b*                                  | 0.290               | <i>miR167c</i>                                          | 0.747               |
| <i>Cl</i> -miR167f*                 | 0.371               | <i>Cmo</i> -miR167f*                           | 0.118               | <i>Lsi</i> -U6*                                       | 0.290               | <i>miR166b</i>                                          | 0.747               |
| <i>Cl</i> -18S*                     | 0.582               | <i>Cmo</i> -miR166b                            | 0.251               | <i>LsPP2A</i>                                         | 0.399               | <i>miR167f</i>                                          | 1.053               |
| <i>CLYLS8</i> *                     | 0.740               | <i>Cmo</i> -miR167b                            | 0.360               | <i>Lsi</i> -miR167f                                   | 0.468               | <i>U6</i>                                               | 1.437               |
| <i>Cl</i> -miR82                    | 0.776               | <i>Cmo</i> -18S                                | 0.473               | <i>Lsi</i> -18S                                       | 0.502               | <i>18S</i>                                              | 1.791               |
| <i>Cl</i> -miR81                    | 0.819               | <i>CmYLS8</i>                                  | 0.525               | <i>Lsi</i> -miR166u                                   | 0.528               |                                                         |                     |
| <i>Cl</i> -miR170                   | 0.866               | <i>Cmo</i> -miR319b                            | 0.554               | <i>Lsi</i> -miR167c                                   | 0.568               |                                                         |                     |
| <i>Cl</i> -U6                       | 0.916               | <i>Cmo</i> -U6                                 | 0.615               | <i>Lsi</i> -miR398b                                   | 0.605               |                                                         |                     |
| <i>Cl</i> -miR169n-5p               | 0.969               | <i>CmPP2A</i>                                  | 0.664               |                                                       |                     |                                                         |                     |
| <i>Cl</i> -miR166b                  | 1.045               | <i>Cmo</i> -miR160a                            | 0.717               |                                                       |                     |                                                         |                     |
|                                     |                     | <i>Cmo</i> -miR3511-3p                         | 0.786               |                                                       |                     |                                                         |                     |

"\*": represents the optimal reference genes determined by pairwise variation analyses which are presented in Fig 3. The recommended threshold of 0.15 is adopted.
