# Supplementary material for: Identification of Appropriate Reference Genes for Normalization of miRNA Expression in Grafted Watermelon Plants under Different Nutrient Stresses
Source: PubMed Central journal article supplement (PMC5066974; doi:10.1371/journal.pone.0164725), 2016-10-17
Supplement: pone.0164725.s006.pdf [file pone.0164725.s006.pdf]

**S5 Table. Grafted watermelon reference genes ranked according to their expression stability as determined by NormFinder in different sample sets.**

| Scion samples under N, P starvation | Stability value (M) | Squash rootstock samples under N, P starvation | Stability value (M) | Bottle gourd rootstocks samples under N, P starvation | Stability value (M) | All scion and rootstocks under normal growth conditions | Stability value (M) |
|-------------------------------------|---------------------|------------------------------------------------|---------------------|-------------------------------------------------------|---------------------|---------------------------------------------------------|---------------------|
| <i>Cla-18S</i>                      | 0.273               | <i>CmYLS8</i>                                  | 0.155               | <i>Lsi-miR166b</i>                                    | 0.155               | <i>miR166b</i>                                          | 0.259               |
| <i>CLYLS8</i>                       | 0.349               | <i>Cmo-miR319a</i>                             | 0.245               | <i>Lsi-miR167f</i>                                    | 0.176               | <i>miR167c</i>                                          | 0.429               |
| <i>Cla-miR167c</i>                  | 0.364               | <i>Cmo-18S</i>                                 | 0.263               | <i>Lsi-U6</i>                                         | 0.280               | <i>U6</i>                                               | 0.716               |
| <i>Cla-miR167f</i>                  | 0.434               | <i>Cmo-miR166b</i>                             | 0.277               | <i>LsPP2A</i>                                         | 0.292               | <i>miR167f</i>                                          | 1.313               |
| <i>Cla-miR1</i>                     | 0.451               | <i>Cmo-miR167b</i>                             | 0.324               | <i>Lsi-18S</i>                                        | 0.321               | <i>18S</i>                                              | 1.503               |
| <i>Cla-miR2</i>                     | 0.470               | <i>Cmo-miR167c</i>                             | 0.335               | <i>Lsi-miR167c</i>                                    | 0.332               |                                                         |                     |
| <i>Cla-U6</i>                       | 0.566               | <i>Cmo-miR167f</i>                             | 0.355               | <i>Lsi-miR166h-3p</i>                                 | 0.377               |                                                         |                     |
| <i>Cla-miR170</i>                   | 0.597               | <i>Cmo-U6</i>                                  | 0.422               | <i>Lsi-miR398b</i>                                    | 0.417               |                                                         |                     |
| <i>Cla-miR169n-5p</i>               | 0.732               | <i>CmPP2A</i>                                  | 0.492               |                                                       |                     |                                                         |                     |
| <i>Cla-miR166b</i>                  | 0.819               | <i>Cmo-miR160a</i>                             | 0.642               |                                                       |                     |                                                         |                     |
|                                     |                     | <i>Cmo-miR3511-3p</i>                          | 0.703               |                                                       |                     |                                                         |                     |
