# Supplementary material for: Identification of Appropriate Reference Genes for Normalization of miRNA Expression in Grafted Watermelon Plants under Different Nutrient Stresses
Source: PubMed Central journal article supplement (PMC5066974; doi:10.1371/journal.pone.0164725), 2016-10-17
Supplement: pone.0164725.s007.pdf [file pone.0164725.s007.pdf]

**S6 Table. Raw Ct values of each reference gene among different samples.**

| Reference gene      |               |                |                    |                    |                    |                    |                    |                       |                       |               |               |
|---------------------|---------------|----------------|--------------------|--------------------|--------------------|--------------------|--------------------|-----------------------|-----------------------|---------------|---------------|
| Sample              | <i>Cla-U6</i> | <i>Cla-18S</i> | <i>Cla-miR166b</i> | <i>Cla-miR167c</i> | <i>Cla-miR167f</i> | <i>Cla-miR81</i>   | <i>Cla-miR82</i>   | <i>Cla-miR169n-5p</i> | <i>Cla-miR170</i>     | <i>CLYLS8</i> |               |
| <b>N sufficient</b> |               |                |                    |                    |                    |                    |                    |                       |                       |               |               |
| (Wm/Wm)L            | 21.59         | 14.20          | 25.44              | 25.86              | 22.92              | 28.97              | 34.57              | 27.89                 | 28.97                 | 26.14         |               |
| (Wm/Sq)L            | 20.75         | 13.97          | 26.09              | 26.26              | 23.07              | 31.54              | 35.61              | 27.65                 | 31.50                 | 26.82         |               |
| (Wm/Bg)L            | 20.55         | 14.53          | 26.20              | 26.68              | 22.78              | 30.36              | 35.40              | 27.92                 | 30.85                 | 26.76         |               |
| <b>N deficient</b>  |               |                |                    |                    |                    |                    |                    |                       |                       |               |               |
| (Wm/Wm)L            | 21.45         | 14.10          | 25.69              | 26.67              | 23.70              | 29.27              | 34.14              | 27.74                 | 28.64                 | 25.91         |               |
| (Wm/Sq)L            | 22.71         | 13.92          | 27.59              | 26.07              | 22.91              | 30.57              | 34.21              | 27.02                 | 30.64                 | 26.72         |               |
| (Wm/Bg)L            | 22.66         | 16.58          | 26.22              | 27.85              | 23.78              | 31.94              | 35.47              | 30.98                 | 32.51                 | 26.73         |               |
| <b>P sufficient</b> |               |                |                    |                    |                    |                    |                    |                       |                       |               |               |
| (Wm/Wm)L            | 22.66         | 13.77          | 26.90              | 26.73              | 23.37              | 30.12              | 33.88              | 26.90                 | 30.74                 | 26.60         |               |
| (Wm/Sq)L            | 20.77         | 13.96          | 25.15              | 25.16              | 22.03              | 30.67              | 35.00              | 27.63                 | 30.39                 | 26.50         |               |
| (Wm/Bg)L            | 22.04         | 14.19          | 25.33              | 25.84              | 22.65              | 29.89              | 35.33              | 28.17                 | 29.75                 | 26.74         |               |
| <b>P deficient</b>  |               |                |                    |                    |                    |                    |                    |                       |                       |               |               |
| (Wm/Wm)L            | 22.91         | 14.27          | 26.57              | 25.87              | 22.65              | 30.91              | 34.28              | 27.30                 | 31.28                 | 26.84         |               |
| (Wm/Sq)L            | 21.98         | 14.33          | 26.87              | 25.25              | 21.58              | 29.34              | 35.28              | 28.88                 | 29.94                 | 27.51         |               |
| (Wm/Bg)L            | 22.56         | 15.62          | 24.40              | 27.73              | 24.00              | 31.91              | 35.13              | 30.93                 | 32.87                 | 27.18         |               |
| <b>max-min</b>      | 2.37          | 2.81           | 3.20               | 2.69               | 2.42               | 2.97               | 1.73               | 4.08                  | 4.23                  | 1.60          |               |
| <b>median</b>       | 22.01         | 14.20          | 26.14              | 26.16              | 22.91              | 30.46              | 35.06              | 27.82                 | 30.69                 | 26.73         |               |
| Reference gene      |               |                |                    |                    |                    |                    |                    |                       |                       |               |               |
| Sample              | <i>Cmo-U6</i> | <i>Cmo-18S</i> | <i>Cmo-miR166b</i> | <i>Cmo-miR167c</i> | <i>Cmo-miR167f</i> | <i>Cmo-miR167b</i> | <i>Cmo-miR160a</i> | <i>Cmo-miR319b</i>    | <i>Cmo-miR3511-3p</i> | <i>CmPP2A</i> | <i>CmYLS8</i> |
| <b>N sufficient</b> |               |                |                    |                    |                    |                    |                    |                       |                       |               |               |
| (Sq)R               | 23.20         | 14.80          | 25.88              | 25.93              | 24.56              | 24.32              | 25.89              | 28.68                 | 27.35                 | 28.62         | 27.73         |
| (Wm/Sq)R            | 21.06         | 14.23          | 24.96              | 25.09              | 23.54              | 23.72              | 24.62              | 27.17                 | 26.70                 | 27.87         | 26.75         |
| <b>N deficient</b>  |               |                |                    |                    |                    |                    |                    |                       |                       |               |               |
| (Sq)R               | 22.60         | 13.61          | 26.06              | 25.56              | 24.11              | 22.89              | 26.17              | 27.80                 | 25.49                 | 27.84         | 27.13         |
| (Wm/Sq)R            | 22.50         | 14.32          | 26.22              | 25.97              | 24.71              | 24.27              | 26.09              | 27.87                 | 26.38                 | 27.77         | 26.95         |
| <b>P sufficient</b> |               |                |                    |                    |                    |                    |                    |                       |                       |               |               |
| (Sq)R               | 22.25         | 14.23          | 26.34              | 26.52              | 25.09              | 24.59              | 26.20              | 28.40                 | 26.28                 | 27.56         | 26.94         |
| (Wm/Sq)R            | 22.39         | 15.83          | 27.72              | 27.91              | 26.67              | 25.86              | 28.34              | 28.88                 | 26.17                 | 27.94         | 27.94         |
| <b>P deficient</b>  |               |                |                    |                    |                    |                    |                    |                       |                       |               |               |
| (Sq)R               | 21.89         | 14.09          | 25.78              | 25.09              | 23.89              | 23.61              | 25.99              | 28.52                 | 26.67                 | 27.41         | 26.81         |
| (Wm/Sq)R            | 23.06         | 15.52          | 25.99              | 25.89              | 24.52              | 24.26              | 24.78              | 28.21                 | 28.40                 | 29.33         | 27.67         |
| <b>max-min</b>      | 2.14          | 2.23           | 2.77               | 2.82               | 3.13               | 2.97               | 3.72               | 1.71                  | 2.91                  | 1.92          | 1.20          |
| <b>median</b>       | 22.44         | 14.27          | 26.02              | 25.91              | 24.54              | 24.27              | 26.04              | 28.30                 | 26.52                 | 27.85         | 27.04         |

| Reference gene      | <i>Lsi-U6</i> | <i>Lsi-18S</i> | <i>Lsi-miR166b</i> | <i>Lsi-miR167c</i> | <i>Lsi-miR167f</i> | <i>Lsi-miR166u</i> | <i>Lsi-miR398b</i> | <i>LsPP2A</i> |
|---------------------|---------------|----------------|--------------------|--------------------|--------------------|--------------------|--------------------|---------------|
| <b>N sufficient</b> |               |                |                    |                    |                    |                    |                    |               |
| (Bg)R               | 22.55         | 14.68          | 27.14              | 25.90              | 25.31              | 31.04              | 23.93              | 26.90         |
| (Wm/Bg)R            | 22.15         | 15.45          | 26.86              | 26.79              | 26.00              | 31.39              | 25.37              | 26.85         |
| <b>N deficient</b>  |               |                |                    |                    |                    |                    |                    |               |
| (Bg)R               | 22.05         | 14.13          | 26.31              | 26.77              | 24.91              | 29.59              | 25.06              | 25.95         |
| (Wm/Bg)R            | 21.78         | 15.41          | 26.42              | 26.78              | 25.36              | 30.13              | 24.49              | 27.15         |
| <b>P sufficient</b> |               |                |                    |                    |                    |                    |                    |               |
| (Bg)R               | 22.51         | 14.17          | 26.42              | 26.31              | 24.77              | 29.79              | 24.94              | 26.77         |
| (Wm/Bg)R            | 21.97         | 13.83          | 26.70              | 26.84              | 24.84              | 30.11              | 25.01              | 26.52         |
| <b>P deficient</b>  |               |                |                    |                    |                    |                    |                    |               |
| (Bg)R               | 22.43         | 14.77          | 26.63              | 26.91              | 24.48              | 29.39              | 24.37              | 26.67         |
| (Wm/Bg)R            | 22.94         | 15.37          | 27.41              | 27.85              | 26.15              | 31.01              | 26.38              | 26.80         |
| <b>max-min</b>      | 1.16          | 1.62           | 1.10               | 1.96               | 1.67               | 2.00               | 2.45               | 1.20          |
| <b>median</b>       | 22.29         | 14.72          | 26.66              | 26.78              | 25.11              | 30.12              | 24.97              | 26.78         |

| Reference gene | <i>U6</i> | <i>18S</i> | <i>miR166b</i> | <i>miR167c</i> | <i>miR167f</i> |
|----------------|-----------|------------|----------------|----------------|----------------|
| <b>Sample</b>  |           |            |                |                |                |
| (Wm/Wm)L       | 23.64     | 13.85      | 26.55          | 26.63          | 22.86          |
| (Wm/Sq)L       | 21.29     | 13.80      | 24.56          | 25.92          | 21.98          |
| (Wm/Bg)L       | 21.87     | 14.69      | 25.56          | 25.59          | 21.88          |
| (Sq)R          | 24.02     | 13.71      | 28.89          | 29.89          | 28.18          |
| (Wm/Sq)R       | 25.03     | 13.96      | 28.37          | 30.37          | 28.36          |
| (Bg)R          | 23.38     | 14.36      | 29.71          | 31.32          | 28.84          |
| (Wm/Bg)R       | 23.13     | 13.60      | 28.65          | 29.93          | 27.44          |
| <b>max-min</b> | 3.75      | 1.09       | 5.15           | 5.73           | 6.96           |
| <b>median</b>  | 23.38     | 13.85      | 28.37          | 29.89          | 27.44          |

Wm/Wm: self-grafted watermelon; Wm/Sq: squash-grafted watermelon; Wm/Bg: bottle gourd-grafted watermelon, Sq: non-grafted squash; Bg: non-grafted bottle gourd. "L" represents leaf, "R" represents root.
