# Supplementary material for: Identification of Appropriate Reference Genes for Normalization of miRNA Expression in Grafted Watermelon Plants under Different Nutrient Stresses
Source: PubMed Central journal article supplement (PMC5066974; doi:10.1371/journal.pone.0164725), 2016-10-17
Supplement: pone.0164725.s008.pdf [file pone.0164725.s008.pdf]

**S7 Table. Expression of *miR85* in watermelon, squash and bottle gourd under nutrient stresses.**

| Reference gene | <i>miR166b</i> <sup>a</sup>    | <i>miR167c</i> <sup>b</sup> | <i>miR167f</i> <sup>b</sup> | <i>miR167c&amp;miR167f&amp;18S&amp;YLS8</i> <sup>c</sup> |
|----------------|--------------------------------|-----------------------------|-----------------------------|----------------------------------------------------------|
| Wm/Wm+N        | 0.80±0.14                      | 0.91±0.05                   | 0.79±0.13                   | 0.93±0.04                                                |
| Wm/Wm-N        | 0.67±0.11                      | 0.50±0.10                   | 0.26±0.04                   | 0.30±0.05                                                |
| Wm/Wm+P        | 1.21±0.10                      | 1.30±0.13                   | 1.24±0.11                   | 1.14±0.09                                                |
| Wm/Wm-P        | 0.51±0.05                      | 0.73±0.09                   | 0.66±0.07                   | 0.58±0.06                                                |
| Reference gene | <i>miR3511-3p</i> <sup>a</sup> | <i>miR167c</i> <sup>b</sup> | <i>miR167f</i> <sup>b</sup> | <i>miR167c&amp;miR167f</i> <sup>c</sup>                  |
| Sq+N           | 0.93±0.12                      | 0.90±0.08                   | 0.96±0.1                    | 0.93±0.08                                                |
| Sq-N           | 1.06±0.01                      | 1.94±0.12                   | 2.18±0.07                   | 2.06±0.08                                                |
| Sq+P           | 0.79±0.12                      | 0.85±0.08                   | 0.74±0.13                   | 0.79±0.11                                                |
| Sq-P           | 0.58±0.17                      | 0.18±0.005                  | 0.19±0.006                  | 0.18±0.003                                               |
| Reference gene | <i>miR398b</i> <sup>a</sup>    | <i>miR166b</i> <sup>b</sup> | <i>U6</i> <sup>b</sup>      | <i>miR166b&amp;U6</i> <sup>c</sup>                       |
| Bg+N           | 1.03±0.04                      | 0.94±0.10                   | 1.03±0.02                   | 0.98±0.05                                                |
| Bg-N           | 1.83±0.20                      | 1.29±0.27                   | 0.83±0.10                   | 1.00±0.16                                                |
| Bg+P           | 0.90±0.08                      | 0.95±0.12                   | 0.86±0.10                   | 0.90±0.11                                                |
| Bg-P           | 1.55±0.12                      | 3.74±0.28                   | 1.63±0.08                   | 2.37±0.12                                                |

a, the least stable reference gene; b, single best reference gene; c, the best pair of reference genes.
