# Supplementary material for: Identification of Appropriate Reference Genes for Normalization of miRNA Expression in Grafted Watermelon Plants under Different Nutrient Stresses
Source: PubMed Central journal article supplement (PMC5066974; doi:10.1371/journal.pone.0164725), 2016-10-17
Supplement: pone.0164725.s009.pdf [file pone.0164725.s009.pdf]

**S8 Table . Expression profiles of target miRNAs retrieved from small RNA-seq.**

| Name <sup>a</sup>  | ID                        | Length (nt) | Sequence           | Normalized reads |          |          | fold-change<br>(Wm/Bg)L/(Wm/Wm)L | fold-change<br>(Wm/Sq)L/(Wm/Wm)L |
|--------------------|---------------------------|-------------|--------------------|------------------|----------|----------|----------------------------------|----------------------------------|
|                    |                           |             |                    | (Wm/Wm)L         | (Wm/Bg)L | (Wm/Sq)L |                                  |                                  |
| <i>Cla-miR164a</i> | conservative_Chr6_1471618 | 18          | TGGAGAAGCAGGGCACGT | 35               | 11       | 5        | 0.31                             | 0.14                             |

---

| Name <sup>b</sup>  | ID                       | Length (nt) | Sequence              | Normalized reads |          | fold-change<br>(Wm/Sq)R/(Sq)R |
|--------------------|--------------------------|-------------|-----------------------|------------------|----------|-------------------------------|
|                    |                          |             |                       | (Sq)R            | (Wm/Sq)R |                               |
| <i>Cmo-miR397a</i> | conservative_Chr3_631288 | 21          | TCATTGAGTGCAGCGTTGATG | 15               | 10       | 0.67                          |

---

| Name <sup>c</sup>   | ID                        | Length (nt) | Sequence                 | Normalized reads |          | fold change<br>(Wm/Bg)R/(Bg)R |
|---------------------|---------------------------|-------------|--------------------------|------------------|----------|-------------------------------|
|                     |                           |             |                          | (Bg)R            | (Wm/Bg)R |                               |
| <i>Lsi-miR5148a</i> | conservative_Chr9_2357062 | 24          | GGAGGGGTGCTTGCTTAAGGTCTG | 59               | 23       | 0.39                          |

---

| Name <sup>d</sup> | ID                          | Length (nt) | Sequence            | Normalized reads |       |          |       |          |
|-------------------|-----------------------------|-------------|---------------------|------------------|-------|----------|-------|----------|
|                   |                             |             |                     | (Wm/Wm)L         | (Sq)R | (Wm/Sq)R | (Bg)R | (Wm/Bg)R |
| <i>miR85</i>      | unconservative_Chr7_1728984 | 19          | AGGACTTTGAAAAGAAAGA | 4                | 5     | 5        | 9     | 5        |

a, *Citrullus lanatus* miRNA b, *Cucurbita moschata* miRNA c, *Lagenaria siceraria* miRNA

Wm/Wm: self-grafted watermelon; Wm/Sq: squash-grafted watermelon; Wm/Bg: bottle gourd-grafted watermelon, Sq: non-grafted squash; Bg: non-grafted bottle gourd.

"L" represents leaf, "R" represents root.
