# Supplementary material for: Identification of Appropriate Reference Genes for Normalization of miRNA Expression in Grafted Watermelon Plants under Different Nutrient Stresses
Source: PubMed Central journal article supplement (PMC5066974; doi:10.1371/journal.pone.0164725), 2016-10-17
Supplement: pone.0164725.s010.pdf [file pone.0164725.s010.pdf]

S9 Table. Relative expression of *Cla-miR164a*, *Cmo-miR397a*, *Lsi-miR5148a*.

| Reference gene      |       | <i>U6</i>   | <i>18S</i> | <i>miR166b</i> | <i>miR167c</i> | <i>miR167f</i> |
|---------------------|-------|-------------|------------|----------------|----------------|----------------|
| Sample              |       |             |            |                |                |                |
| <i>Cla-miR164a</i>  | Wm/Wm | 0.97±0.04   | 1.05±0.05  | 1.05±0.06      | 1.09±0.04      | 1.00±0.04      |
|                     | Wm/Sq | 0.37±0.0014 | 1.36±0.1   | 0.37±0.0038    | 0.86±0.02      | 0.66±0.01      |
|                     | Wm/Bg | 0.35±0.02   | 1.35±0.05  | 0.58±0.0077    | 0.71±0.0038    | 0.62±0.005     |
| Reference gene      |       | <i>U6</i>   | <i>18S</i> | <i>miR166b</i> | <i>miR167c</i> | <i>miR167f</i> |
| Sample              |       |             |            |                |                |                |
| <i>Cmo-miR397a</i>  | Sq    | 0.88±0.05   | 0.84±0.07  | 0.99±0.02      | 0.92±0.05      | 0.86±0.07      |
|                     | Wm/Sq | 0.76±0.05   | 0.70±0.05  | 0.33±0.02      | 0.59±0.02      | 0.31±0.02      |
| Reference gene      |       | <i>U6</i>   | <i>18S</i> | <i>miR166b</i> | <i>miR167c</i> | <i>miR167f</i> |
| Sample              |       |             |            |                |                |                |
| <i>Lsi-miR5148a</i> | Bg    | 1.11±0.19   | 0.93±0.03  | 1.02±0.01      | 1.07±0.05      | 0.96±0.02      |
|                     | Wm/Bg | 2.08±0.09   | 1.24±0.02  | 2.13±0.13      | 0.74±0.03      | 0.96±0.02      |
